# Supplementary material for: Reactions of thiosemicarbazones derived from β-keto amides and β-keto esters with Zn(ii) and Cd(ii) acetates: influence of metal, substitution, reagent ratio and temperature on metal-induced cyclization
Source: Royal Society of Chemistry journal article supplement (doi:10.1039/b401674b), 2004-01-01
Supplement: b401674b.doc [file b401674b.doc]

Reactions of thiosemicarbazones derived from -keto amides and -keto esters with Zn(II) and Cd(II) acetates: Influence of metal, substitution, reagent ratio and temperature on metal-induced cyclization

José S. Casas, María V. Castaño, María S. García-Tasende, Enrique Rodríguez-Castellón, Agustín Sánchez , Luisa M. Sanjuán and José Sordo

**Supplementary Material**

**SM1**

**Analytical and spectrocopic data for the ligands**

The IR spectra of all the ligands were interpreted in accordance with the literature1 and the 1H and 13C NMR spectra of both types of ligand on the basis of previous work,2b,c signal integrations and, in some cases, DEPT, HMBC and HMQC experiments. The NMR spectra of HTSC1 and HTSC5 show just one set of signals, and those of HTSC3 and HTSC4  two sets [except for C(7)H3 in both 1H spectra and for C(1)S in the 13C NMR spectrum of HTSC3], suggesting that two conformers exist in solution (only signals for the major conformer are included). The 1H and 13C NMR spectra of HL3 and HL4 are simple and show only one set of signals, while the 1H spectrum of HL5 shows very broad duplicated signals for most groups and its 13C spectrum only shows signals for C(1)S and R1, suggesting an equilibrium among different conformers of this ligand in DMSO solution.

# HTSC1. Mp: 180°C. *Anal*. Calcd. for C12H16N4O2S: C, 51.4; H, 5.7; N, 20.0; S, 11.4 %. Found: C, 51.5; H, 5.8; N, 20.0; S, 11.0 %. MS (EI), *m/z* (%): 280 (3.0) [M], 158 (33.3) [M-NHPh(OCH3)], 123 (100.0) [NH2Ph(OCH3)], 60 (29.1) [C(S)NH2]. IR: 3421s, 3286s, 3324s, 3170m, (N-H); 1652vs, (C=O); 1603vs, (C=N); 1549s, 1244s,br, (NH-Ph(OCH3)); 1450sh, (O-CH3); 1244s,br, 1032m, (C-O); 1095m, 827m, (C=S). 1H NMR: [N(2)H] = 10.16s(1); [N(4)H] = 9.92s(1); [N(1)H2] = 8.14s(1), 7.60s(1); [C(8-11)H] = 7.46d(2), 6.87d(2); [C(12)H3] = 3.70s(3); [C(3)H2] = 3.28s(2); [C(5)H3] = 1.96s(3). 13C NMR: [C(1)] = 178.7; [C(4)] = 166.6; [C(9)] = 155.2; [C(2)] = 148.9; [C(6)] = 131.2; [C(7,11)] = 120.7; [C(8,10)] = 113.8; [C(12)] = 55.0; [C(3)] = 46.3; [C(5)] = 16.7. HTSC2. IR: 3486s, 3354s, 3220s, (N-H); 1723s, (C=O); 1528s, (C=N); 1475m, (O-CH2); 1182s, (C-O); 1085m, 852m, (C=S). 1H NMR: [N(2)H] = 10.11s(1); [N(1)H2] = 8.19s(1), 7.50s(1); [C(7)H2] = 4.09c(2); [C(3)H] = 3.39c(1); [C(5)H3] = 1.88s(3); [C(6)H3] = 1.21d(3); [C(8)H3] = 1.15t(3). 13C NMR: [C(1)] = 178.9; [C(4)] = 172.0; [C(2)] = 150.8,; [C(7)] = 60.4; [C(3)] = 47.7; [C(6)] = 14.8; [C(5)] = 14.1; [C(8)] = 13.9. HTSC3. Mp: 85°C. *Anal*. Calcd. for C7H13N3O2S: C, 41.4; H, 6.4; N, 20.7; S, 15.8 %. Found: C, 40.3; H, 6.9; N, 21.9; S, 16.6 %. MS (EI), *m/z* (%): 203 (77.6) [M], 174 (92.0) [M-CH2CH3], 172 (10.8) [M-OCH3], 130 (100.0) [M-CH2C(O)OCH3], 60 (90.5) [C(S)NH2]. IR: 3405s, 3267s, 3192s,br, 3155s, (N-H); 1735vs, (C=O); 1592vs, (C=N); 1434m, (O-CH3); 1231s, (C-O); 1095m, 849m, (C=S). 1H NMR: [N(2)H] = 10.29s(1); [N(1)H2] = 8.12s(1), 7.54s(1); [C(7)H3] = 3.62s(3); [C(3)H2] = 3.58s(2); [C(5)H2] = 2.41c(2); [C(6)H3] = 1.01t(3). 13C NMR: [C(1)] = 179.1; [C(4)] = 170.3; [C(2)] = 151.1; [C(7)] = 52.2; [C(3)] = 35.6; [C(5)] = 30.5; [C(6)] = 10.4. HTSC4. Mp: 85°C. *Anal.* Calcd. for C7H13N3O3S: C, 38.3; H, 6.0; N, 19.2; S, 14.6 %. Found: C, 37.5; H, 6.4; N, 20.7; S, 16.1 %. MS (EI), *m/z* (%): 219 (12.1) [M], 188 (8.4) [M-OCH3], 174 (81.2) [M-CH2OCH3], 60 (23.8) [C(S)NH2]. IR: 3424s, 3261s, 3213s, 3170s, (N-H); 1733s, (C=O); 1607s, (C=N); 1477m, (O-CH2); 1455m, 1435w, (O-CH3); 1238s, (C-O); 1076s, 850m, (C=S). 1H NMR: [N(2)H] = 10.52s(1); [N(1)H2] = 8.24s(1), 7.78s(1); [C(5)H2] = 3.94s(2); [C(7)H3] = 3.62s(3); [C(3)H2] = 3.58s(2); [C(6)H3] = 3.18s(3). 13C NMR: [C(1)] = 179.6; [C(4)] = 168.5; [C(2)] = 144.1; [C(5)] = 74.9; [C(6)] = 58.0; [C(7)] = 52.2; [C(3)] = 33.0. HTSC5. Mp: 80°C. *Anal.* Calcd for C12H15N3O2S: C, 54.3; H, 5.7; N, 16.0; S, 12.1 %. Found: C, 54.0; H, 5.8; N, 16.1; S, 12.5 %. MS (EI), *m/z* (%): 265 (28.4) [M], 220 (19.3) [M-OEt], 178 (62.1) [M-CH2C(O)OEt], 160 (100.0) [M-OEt-C(S)NH2], 60 (33.2) [C(S)NH2]. IR: 3408s, 3225s,br, 3152s, (N-H); 1723vs, (C=O); 1595vs, (C=N); 1465m, (O-CH2); 1248vs, (C-O); 1090m, 844m, (C=S). 1H NMR: [N(2)H] = 10.61s(1); [N(1)H2] = 8.38s(1), 8.03s(1); [C(6,10)H] = 7.87d(2); [C(7-9)H] = 7.38m(3); [C(3)H2] = 4.06s(2); [C(11)H2] = 4.05c(2); [C(12)H3] = 1.15t(3). 13C NMR: [C(1)] = 179.1; [C(4)] = 168.2; [C(2)] = 142.3; [C(5)] = 136.7; [C(6,10)] = 129.2; [C(7,9)] = 128.2; [C(8)] = 126.4; [C(11)] = 60.7; [C(3)] = 33.4; [C(12)] = 13.9. HL1. IR: 3269vs, 3164vs, (N-H); 1654vs,br, (C=O); 1592vs, 1550vs, 1507m (ring); 1336s, (C-N); 1093s, 875m, (C=S). 1H NMR: [N(3)H] = 11.98s(1); [N(1)H2] = 10.36s(1), 9.66s(1); [C(3)H] = 5.16s(1); [C(5)H3] = 2.17s(3). 13C NMR: [C(1)] = 175.8; [C(4)] = 163.3; [C(2)] = 152.7; [C(3)] = 91.4; [C(5)] = 12.1. HL2. IR: 3275vs, 3228s, (N-H); 1664vs, (C=O); 1600sh, 1581vs,br, 1512m (ring); 1331s, (C-N); 1105s, 902m, (C=S). MS (EI), *m/z* (%): 171 (75) [M], 111 (100) [M-C(S)NH2], 97 (42) [M-NC(S)NH2]. 1H NMR: [N(3)H] = 10.50s(1); [N(1)H2] = 10.39s(1), 9.63s(1); [C(5)H3] = 2.13s(3); [C(6)H3] = 1.65s(3). 13C NMR: [C(1)] = 175.9; [C(4)] = 163.1; [C(2)] = 149.9; [C(3)] = 98.7; [C(5)] = 10.7; [C(6)] = 6.0. HL3. Mp: 165°C. *Anal*. Calcd for C6H9N3OS: C, 42.1; H, 5.3; N, 24.5; S, 18.7 %. Found: C, 42.5; H, 4.8; N, 24.6; S, 19.3 %. MS (EI), *m/z* (%): 171 (39.8) [M], 111 (28.3) [M-C(S)NH2], 97 (82.0) [M-NC(S)NH2], 60 (31.1) [C(S)NH2]. IR: 3275s, 3177s, 3084s, (N-H); 1657vs, (C=O); 1596vs, 1546vs, 1500w (ring); 1337s, (C-N); 1093s, 874s, (C=S). 1H NMR: [N(3)H] = 11.99s(1); [N(1)H2] = 10.37s(1), 9.69s(1); [C(3)H] = 5.21s(1); [C(5)H2] = 2.52c(2); [C(6)H3] = 1.13t(3). 13C NMR: [C(1)] = 175.9; [C(4)] = 163.3; [C(2)] = 158.2; [C(3)] = 89.9; [C(5)] = 19.3; [C(6)] = 12.0. HL4. Mp: 160°C. *Anal*. Calcd. for C6H9N3O2S: C, 38.5; H, 4.8; N, 22.4; S, 17.1 %. Found: C, 36.3; H, 4.0; N, 21.2; S, 18.2 %. MS (EI), *m/z* (%): 187 (35.4) [M], 127 (6.2) [M-C(S)NH2], 60 (48.1) [C(S)NH2]. IR: 3293s, 3215s, 3131s, (N-H); 1651vs, (C=O); 1597vs, 1559m, 1507w, (ring); 1467m, (O-CH2); 1299s, (C-N); 1120s, 871s, (C=S). 1H NMR: [N(3)H] = 12.13s(1); [N(1)H2] = 10.36s(1), 9.79s(1); [C(3)H] = 5.30s(1); [C(5)H2] = 4.34s(2); [C(6)H3] = 3.20s(3). 13C NMR: [C(1)] = 176.0; [C(2)] = 145.1; [C(3)] = 89.3; [C(5)] = 65.5; [C(6)] = 58.2. HL5. Mp: 198°C. *Anal.* Calcd. for C10H9N3OS: C, 54.8; H, 4.1; N, 19.2; S, 14.6 %. Found: C, 54.5; H, 4.2; N, 19.1; S, 14.6 %. MS (EI), *m/z* (%): 219 (31.2) [M], 159 (100.0) [M-C(S)NH2], 60 (17.2) [C(S)NH2]. IR: 3294s, 3158m,sh, 3117s, (N-H); 1652vs, (C=O); 1586vs, 1546sh, (ring); 1330m, (C-N); 1104s, 880s, (C=S). 1H NMR: [N(3)H] = 12.25sbr, 11.96sbr, (1); [N(1)H2] = 10.12s,br, 9.64s,br, 10.28s,br, 9.74s,br, (2); [C(6,10)H] = 7.88s,br, (2); [C(7-9)H] = 7.45s,br, (3); [C(3)H] = 6.25s,br, 5.97s,br, (1). 13C NMR: [C(1)] = 176.2; [C(7-9)] = 128.6; [C(6,10)] = 126.5

**ST1. Complexes obtained in the assayed experimental conditions**

| **Ligand** | **Zn** | | | | **Cd** | | | |
| --- | --- | --- | --- | --- | --- | --- | --- | --- |
| **1:1** | | **1:2** | | **1:1** | | **1:2** | |
| **r.t.** | **reflux** | **r.t.** | **reflux** | **r.t.** | **reflux** | **r.t.** | **reflux** |
| **HTSC1** | [Zn(TSC1)2] | * | [Zn(TSC1)2] | [Zn(TSC1)2] | [CdL12]·3H2O | [CdL12]·3H2O | [CdL12]·3H2O | [CdL12]·3H2O |
| **HTSC2** | [Zn(L2-H)] | [Zn(L2-H)] | [ZnL22(H2O)] | [ZnL22(H2O)] | [CdL22] | [CdL22] | [CdL22]  [CdL22(H2O)]·2DMSO | [CdL22] |
| **HTSC3** | [Zn(L3-H)] | [Zn(L3-H)] | [ZnL32] | [ZnL32] (6 h)  [Zn(L3-H)](24 h) | [CdL32]·H2O | [CdL32]·H2O | [CdL32]·H2O | [CdL32]·H2O |
| **HTSC4** | [Zn(L4-H)] | [Zn(L4-H)] | [Zn(TSC4)2](10’)  [ZnL42](6 h) | [ZnL42]  [ZnL42]·0.5H2O | [Cd(TSC4)2] | [CdL42]·H2O | [Cd(TSC4)2] | [CdL42]·H2O |
| **HTSC5** | * | *  [ZnL52]·MeOH | [ZnL52]·MeOH | [ZnL52]·MeOH | [CdL52]·MeOH | [CdL52]·MeOH | [CdL52]·MeOH  [CdL52(DMSO)]·2DMSO | [CdL52]·MeOH |

* unidentified product or mixture.

## ST2. IR spectra of the new complexes

| **Compound** | **(N-H)** | **(C=O)** | **(ring)** | **(C=N)**  **((C-N))** | **(O-CH3)/**  **(O-CH2)** | **(C-O)** | (C=S) |
| --- | --- | --- | --- | --- | --- | --- | --- |
| **[Zn(TSC1)2]a** | 3460m, 3440m, 3346m, 3298m, 3187m | 1677m |  | 1616s | 1442w | 1241s, 1038m | 796w |
| **[Zn(L2-H]** | 3291s | 1613vs | 1613vs, 1525vs | 1385vs |  |  | 815m |
| **[CdL22]** | 3449s, 3157s, 3125s | 1629s | 1580vs, 1511s | 1387vs |  |  | 1018m, 754m |
| **[ZnL32]** | 3409m,br, 3314m,br | 1600vs,br | 1600vs,br, 1496m | 1364s |  |  | 818m |
| **[Zn(L3-H)]** | 3320vs,br, 2244vs, 3221s, 3161s, 3130s | 1601vs,br | 1601vs,br, 1498m | 1364s |  |  | 820m |
| **[CdL32]H2O** | 3312s,br [+**(O-H)**] | 1620s | 1590vs, 1488m | 1386s |  |  | 892m |
| **[Zn(TSC4)2]** | 3439s, 3307m, 3179m | 1721vs |  | 1602s | 1466vs  1431m | 1250sh | 1014m, 744s |
| **[ZnL42]** | 3324sh, 3201vs,br, 3115s, 3066s,br | 1658sh | 1606vs, 1510sh | 1387vs | 1490s |  | 823m |
| **[Zn(L4-H)]** | 3305vs,br, 3188vs,br | 1603vs,br | 1603vs,br, 1507sh | 1369vs,br | 1489s |  | 847m |
| **[Cd(TSC4)2]** | 3432s, 330sm, 3175m | 1721vs |  | 1600s | 1468vs  1435m | 1250sh | 1014m, 739s |
| **[CdL42]H2O** | 3475s, 3268s,br, 3138s [+**(O-H)**] | 1630sh | 1590vs, 1503m | 1363s | 1476s |  | 806s |
| **[ZnL52]MeOH** | 3369s,br, 3174vs,br, 3031vs,br | 1645vs | 1614vs, 1579vs | 1396vs,br |  |  | 933s, 751s |
| **[CdL52]MeOH** | 3457m, 3305s,br, 3184s,br, 3063s,br [+**(O-H)**] | 1610vs | 1588vs, 1575vs | 1391vs |  |  | 924s, 751s |

**a(NHPh(OCH3):** 1547m, 1241s.

**ST3. 1H NMR spectra of the new HTSCn and Ln complexes**

| **Compound** | [N(1)H2] | [R1] | [R2] | [R3] |
| --- | --- | --- | --- | --- |
| **[Zn(TSC1)2]a** | 6.78s(2) | 2.07s, 2.03s, (3) [C(5)H3] | 3.72sbr(2) C(3)H2] | 7.42d(2), 6.85d(2) [C(8-11)H]  3.69s(3) [C(12)H3] |
| **[CdL22]** | 11.93s(1) 9.68s(1) | 1.96s(3) [C(5)H3] | 1.57s(3) [C(6)H3]. |  |
| **[ZnL32]** | 11.34s(1) 10.32s(1) | 2.39c(2) [C(5)H2]  1.08t(3).[C(6)H3] | 4.87s(1) [C(3)H] |  |
| **[CdL32]H2O** | 11.77s(1) 9.73s(1 | 2.38c(2) [C(5)H2]  1.01t(3) [C(6)H3] | 4.71s(1) [C(3)H] |  |
| **[Zn(TSC4)2]** | 6.70s(2) | 4.17s(2) [C(5)H2]  3.13s(3) C(6)H3] | 3.26 [C(3)H2] | 3.58s(3) [C(7)H3] |
| **[ZnL42]** | 11.31s(1) 10.46s(1) | 4.23s(2) [C(5)H2]  3.17s(3).[C(6)H3] | 4.93s(1) [C(3)H2] |  |
| **[Cd(TSC4)2]** | 6.33s(2) | 4.17s(2) [C(5)H2]  3.16s(3) [C(6)H3] | 3.33s(2) [C(3)H2] | 3.58s(3) [C(7)H3] |
| **[CdL42]H2O** | 11.81s(1) 9.96s(1) | 4.15s(2) [C(5)H2  3.14s(3).[C(6)H3] | 4.82s(1) [C(3)H] |  |
| **[ZnL52]MeOHb** | 11.40s,br(1) 10.62s,br(1) | 7.35m(5) [C(6-10)H] | 5.30s(1) [C(3)H] |  |
| **[CdL52]MeOHc** | 11.85s(1), 9.79s(1) | 7.64d(2) [C(6,10)H]  7.37m(3) [C(7-9)H] | 5.20s(1) [C(3)H] |  |

a[N(4)H]: 9.94s(1). b[CH3O*H*] = 4.09c(1); [C*H*3OH] = 3.17d(3). c [CH3O*H*] = 4.10c(1); [C*H*3OH] = 3.11d(3).

**ST4. 13C and 113Cd NMR spectra of some new complexes**

| **Compound** | **[C(1)]** | **[C(2)]** | **[C(3)]** | **[C(4)]** | **[R1]** | [R3] | [113Cd] |
| --- | --- | --- | --- | --- | --- | --- | --- |
| **[Zn(TSC1)2]** | 171.5 | 158.8 | a | 166.6 | 23.6 [C(5)] | 155.4 [C(9)], 132.2 [C(6)]  120.8 [C(7,11)], 114.0 C(8,10)]  55.3 [C(12)] |  |
| **[CdL22]b** | 176.4 | 156.1 | 91.5 | 165.4 | 13.4 |  | 288 |
| **[ZnL32]** | 173.8 | 163.0 | 85.0 | 165.8 | 21.9 [C(5)], 12.8 [C(6)] |  |  |
| **[ZnL32]*** | 176.4 | 162.7 | 89.0, 86.0 | 166.6, 164.5 | 23.0 [C(5)], 17.4, 12.8 [C(6)] |  |  |
| **[Zn(L3-H)]*** | 174.8 | 158.7 | 88.5 | 163.4 | 21.0 [C(5)], 12.5, 9.6 [C(6)] |  |  |
| **[CdL32]H2O** | 176.1 | 162.5 | 83.7 | 166.7 | 21.9 [C(5)], 13.2 [C(6)] |  | 282 |
| **[Zn(TSC4)2]** | 174.0 | 152.7 | 35.0 | 168.3 | 72.1 [C(5)], 57.5 [C(6)] | 51.8 [C(7)] |  |
| **[ZnL42]** | 174.5 | 157.4 | 84.8 | 165.6 | 67.2 [C(5)], 58.1 [C(6)] |  |  |
| **[Cd(TSC4)2]** | 174.1 | 149.3 | 35.2 | 169.1 | 71.5 [C(5)], 57.8 [C(6)] | 52.0 [C(7)] | 448 (439, 371) |
| **[CdL42]H2O** | 176.4 | 157.2 | 83.9 | 166.6 | 67.6 [C(5)], 57.7 [C(6)] |  | 280 |
| **[ZnL52]MeOH** | 174.2 | 159.2 | 86.6 | 166.1 | 131.2 [C(5)], 130.4 [C(6,10)]  128.7 [C(7,9)], 127.0 [C(8)] |  |  |
| **[CdL52]MeOH** | 176.0 | 158.0 | 84.5 | 167.0 | 132.0 [C(5)], 129.0 [C(6,10)]  128.0 [C(7,9)], 127.0 [C(8)] |  | 278 |

aNot observed. b[C(6)] = 7.2. * Solid state 13C NMR.

### ST5. Hydrogen bond lengths [Å] and angles [°] in ligands and complexes

|  | | | | |
| --- | --- | --- | --- | --- |
| D-HA | d(D-H) | d(HA) | d(DA) | >DHA |
|  | HL3 a | | | |
| N(1)-H(1A)O(1) | 0.86 | 1.94 | 2.634(4) | 136.9 |
| N(1)-H(1B)S(1)i | 0.86 | 2.57 | 3.413(4) | 168.9 |
| N(3)-H(3N)O(1)ii | 0.86 | 1.92 | 2.746(3) | 161.1 |
|  | HL5 b | | | |
| N(1)-H(1A)O(1) | 0.90 | 1.94 | 2.664(3) | 136 |
| N(1)-H(1B)S(1)i | 0.89 | 2.54 | 3.404(2) | 162 |
| N(3)-H(3N)O(1)ii | 0.86 | 2.08 | 2.924(2) | 165 |
|  | [ZnL42]0.5H2Oc | | | |
| N(1)-H(1A)O(1) | 0.86 | 2.03 | 2.696(4) | 134.1 |
| N(1)-H(1B)O(1)ii | 0.86 | 1.97 | 2.804(4) | 163.8 |
|  | [CdL22(H2O)]2DMSO d | | | |
| N(1)-H(1A)O(1) | 0.86 | 2.03 | 2.711(3) | 135.0 |
| N(1)-H(1A)O(2D) | 0.86 | 2.45 | 2.902(3) | 113.2 |
| N(1)-H(1B)O(1D) | 0.86 | 2.12 | 2.961(3) | 165.9 |
| O(1w)-H(1w)O(1)ii | 1.04 | 1.77 | 2.807(2) | 174 |
|  | [CdL52(DMSO)]DMSO e | | | |
| N(1)-H(1A)O(1) | 0.86 | 1.93 | 2.617(6) | 136.3 |
| N(1)-H(1B)O(11)ii | 0.86 | 1.94 | 2.770(5) | 163.0 |
| N(11)-H(11A)O(11) | 0.86 | 1.96 | 2.646(6) | 135.6 |
| N(11)-H(11B)O(2D) | 0.86 | 1.96 | 2.749(7) | 151.2 |

ai = -x, y, -z+2; ii = x, y, z-1; bi = -x, -y, -z+1; ii= x-1, y, z;; c ii = –x+5/2, y-1/2, -z+5/4; dii = -x+1/2, -y+1/2, -z;

e ii = x-1, y, z


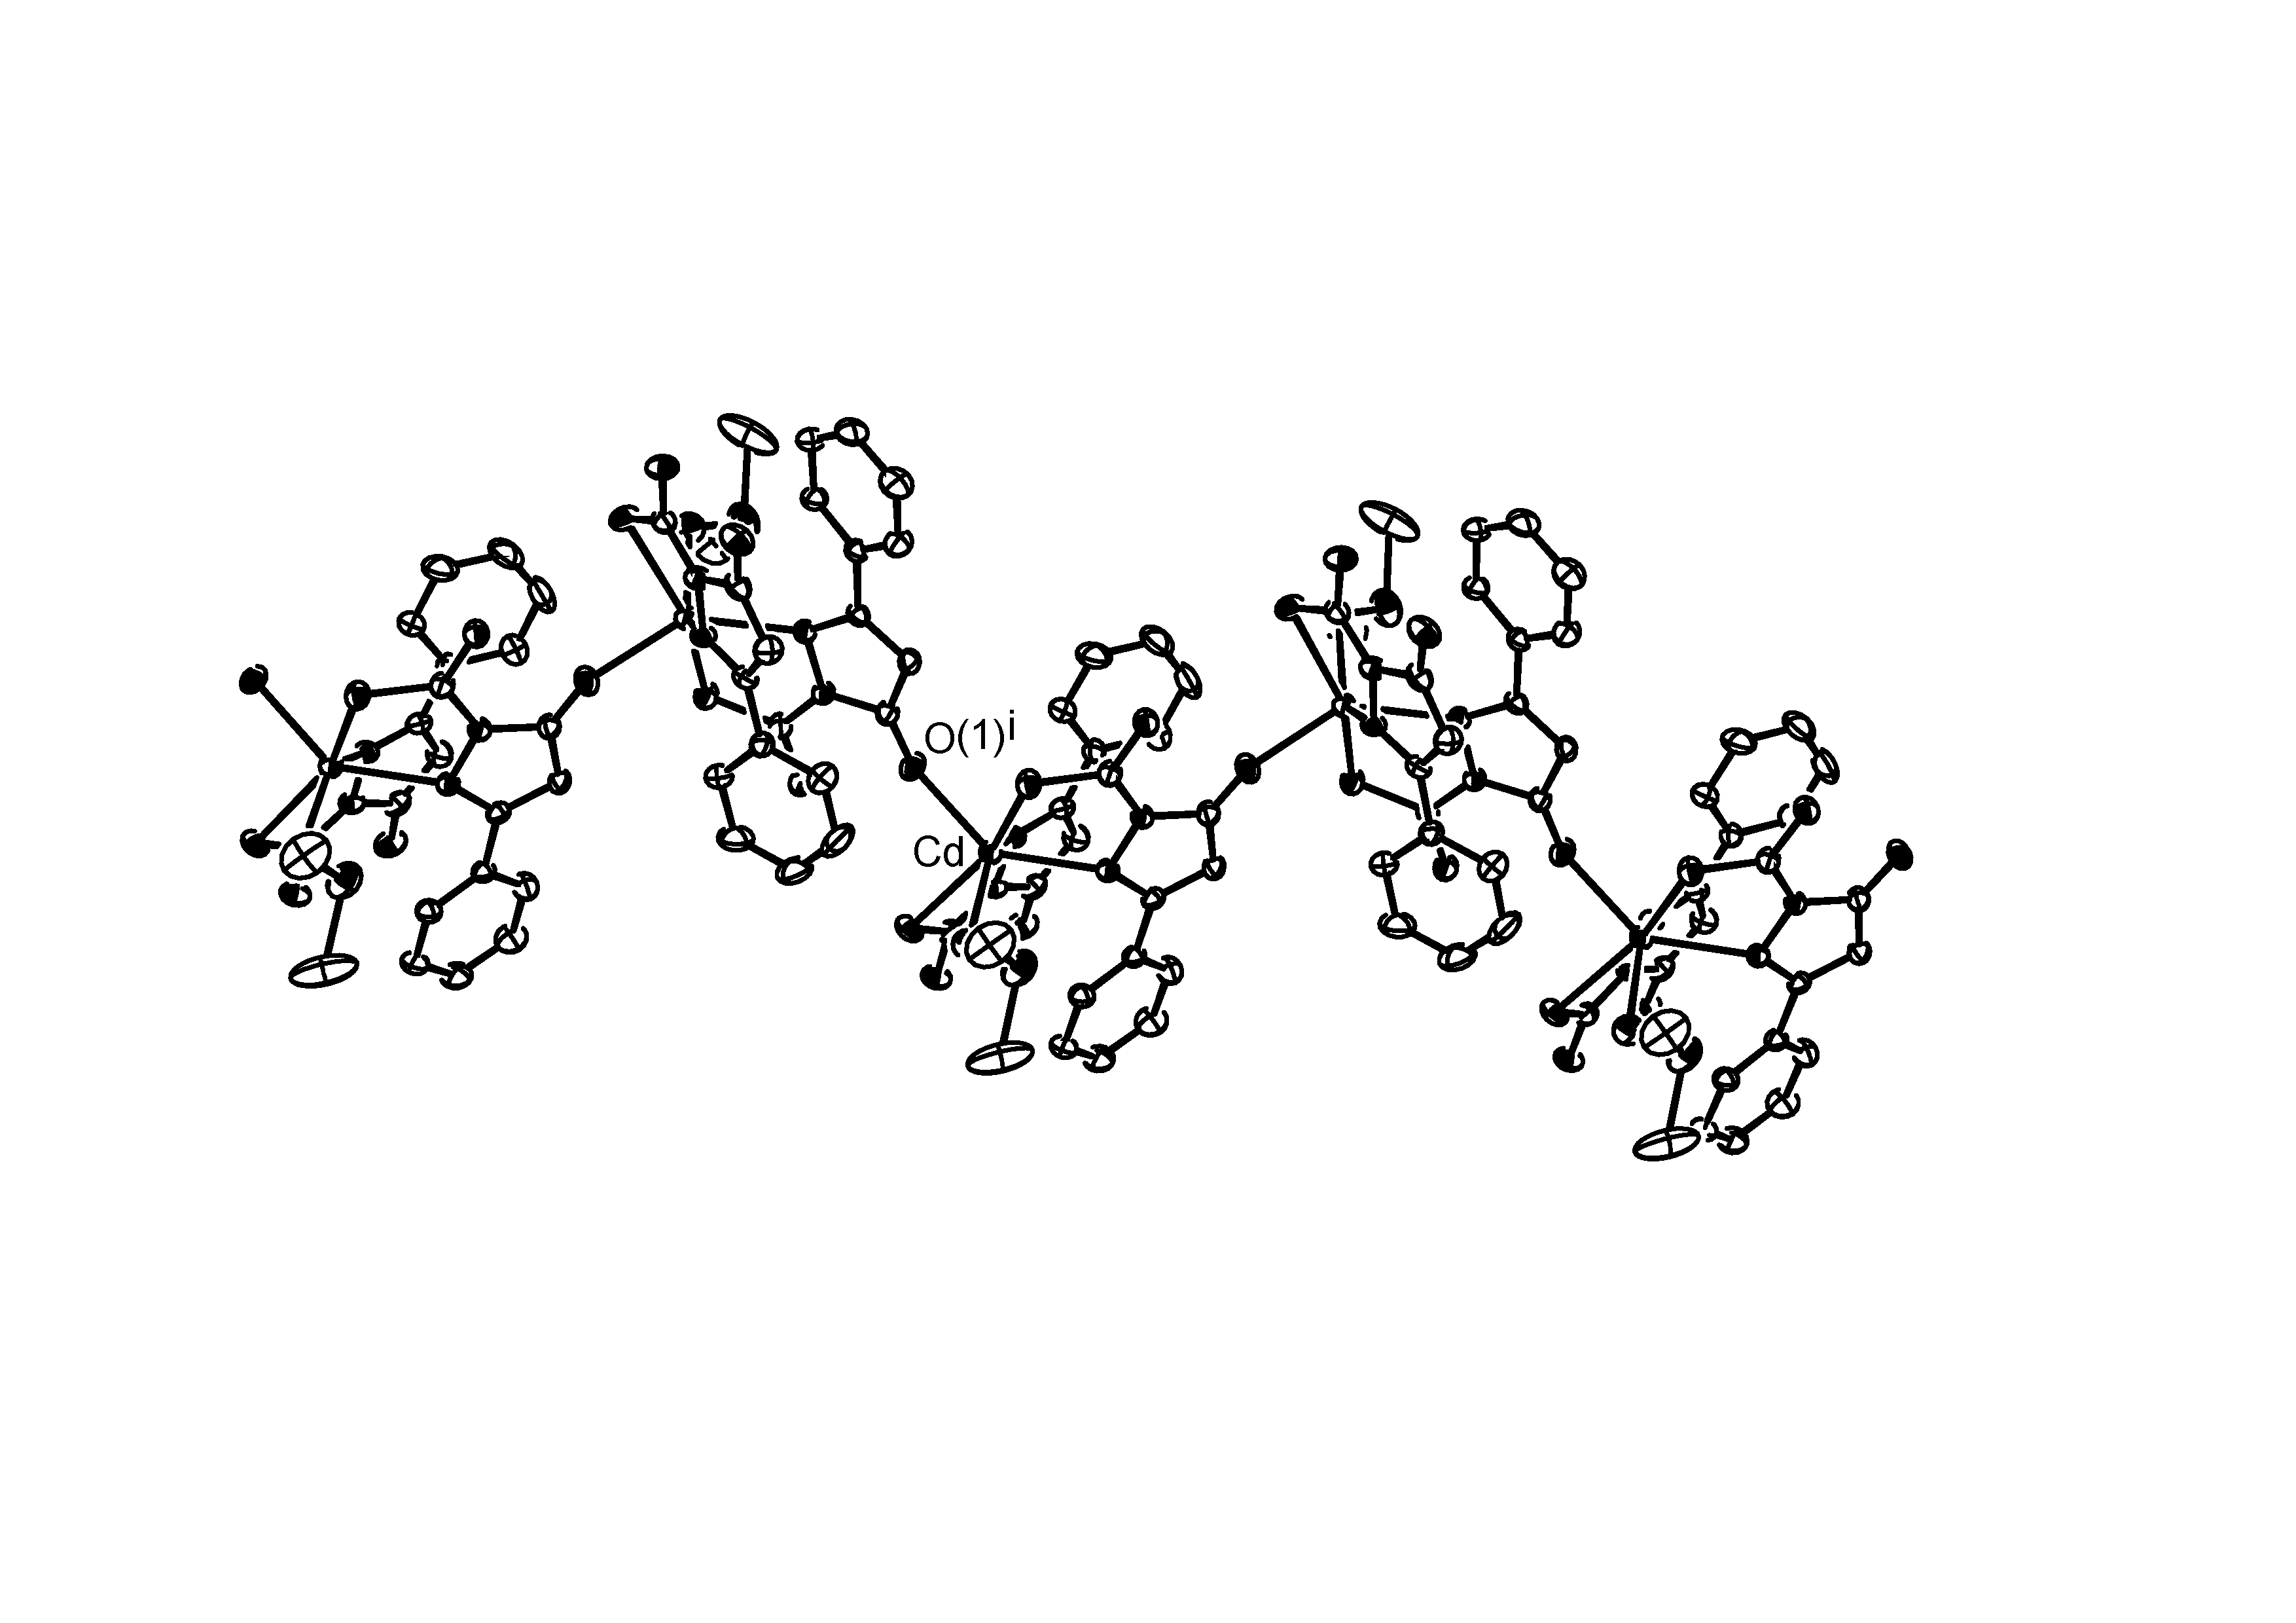


**SF1.** Intermolecular interactions in [CdL52(DMSO)]·DMSO.


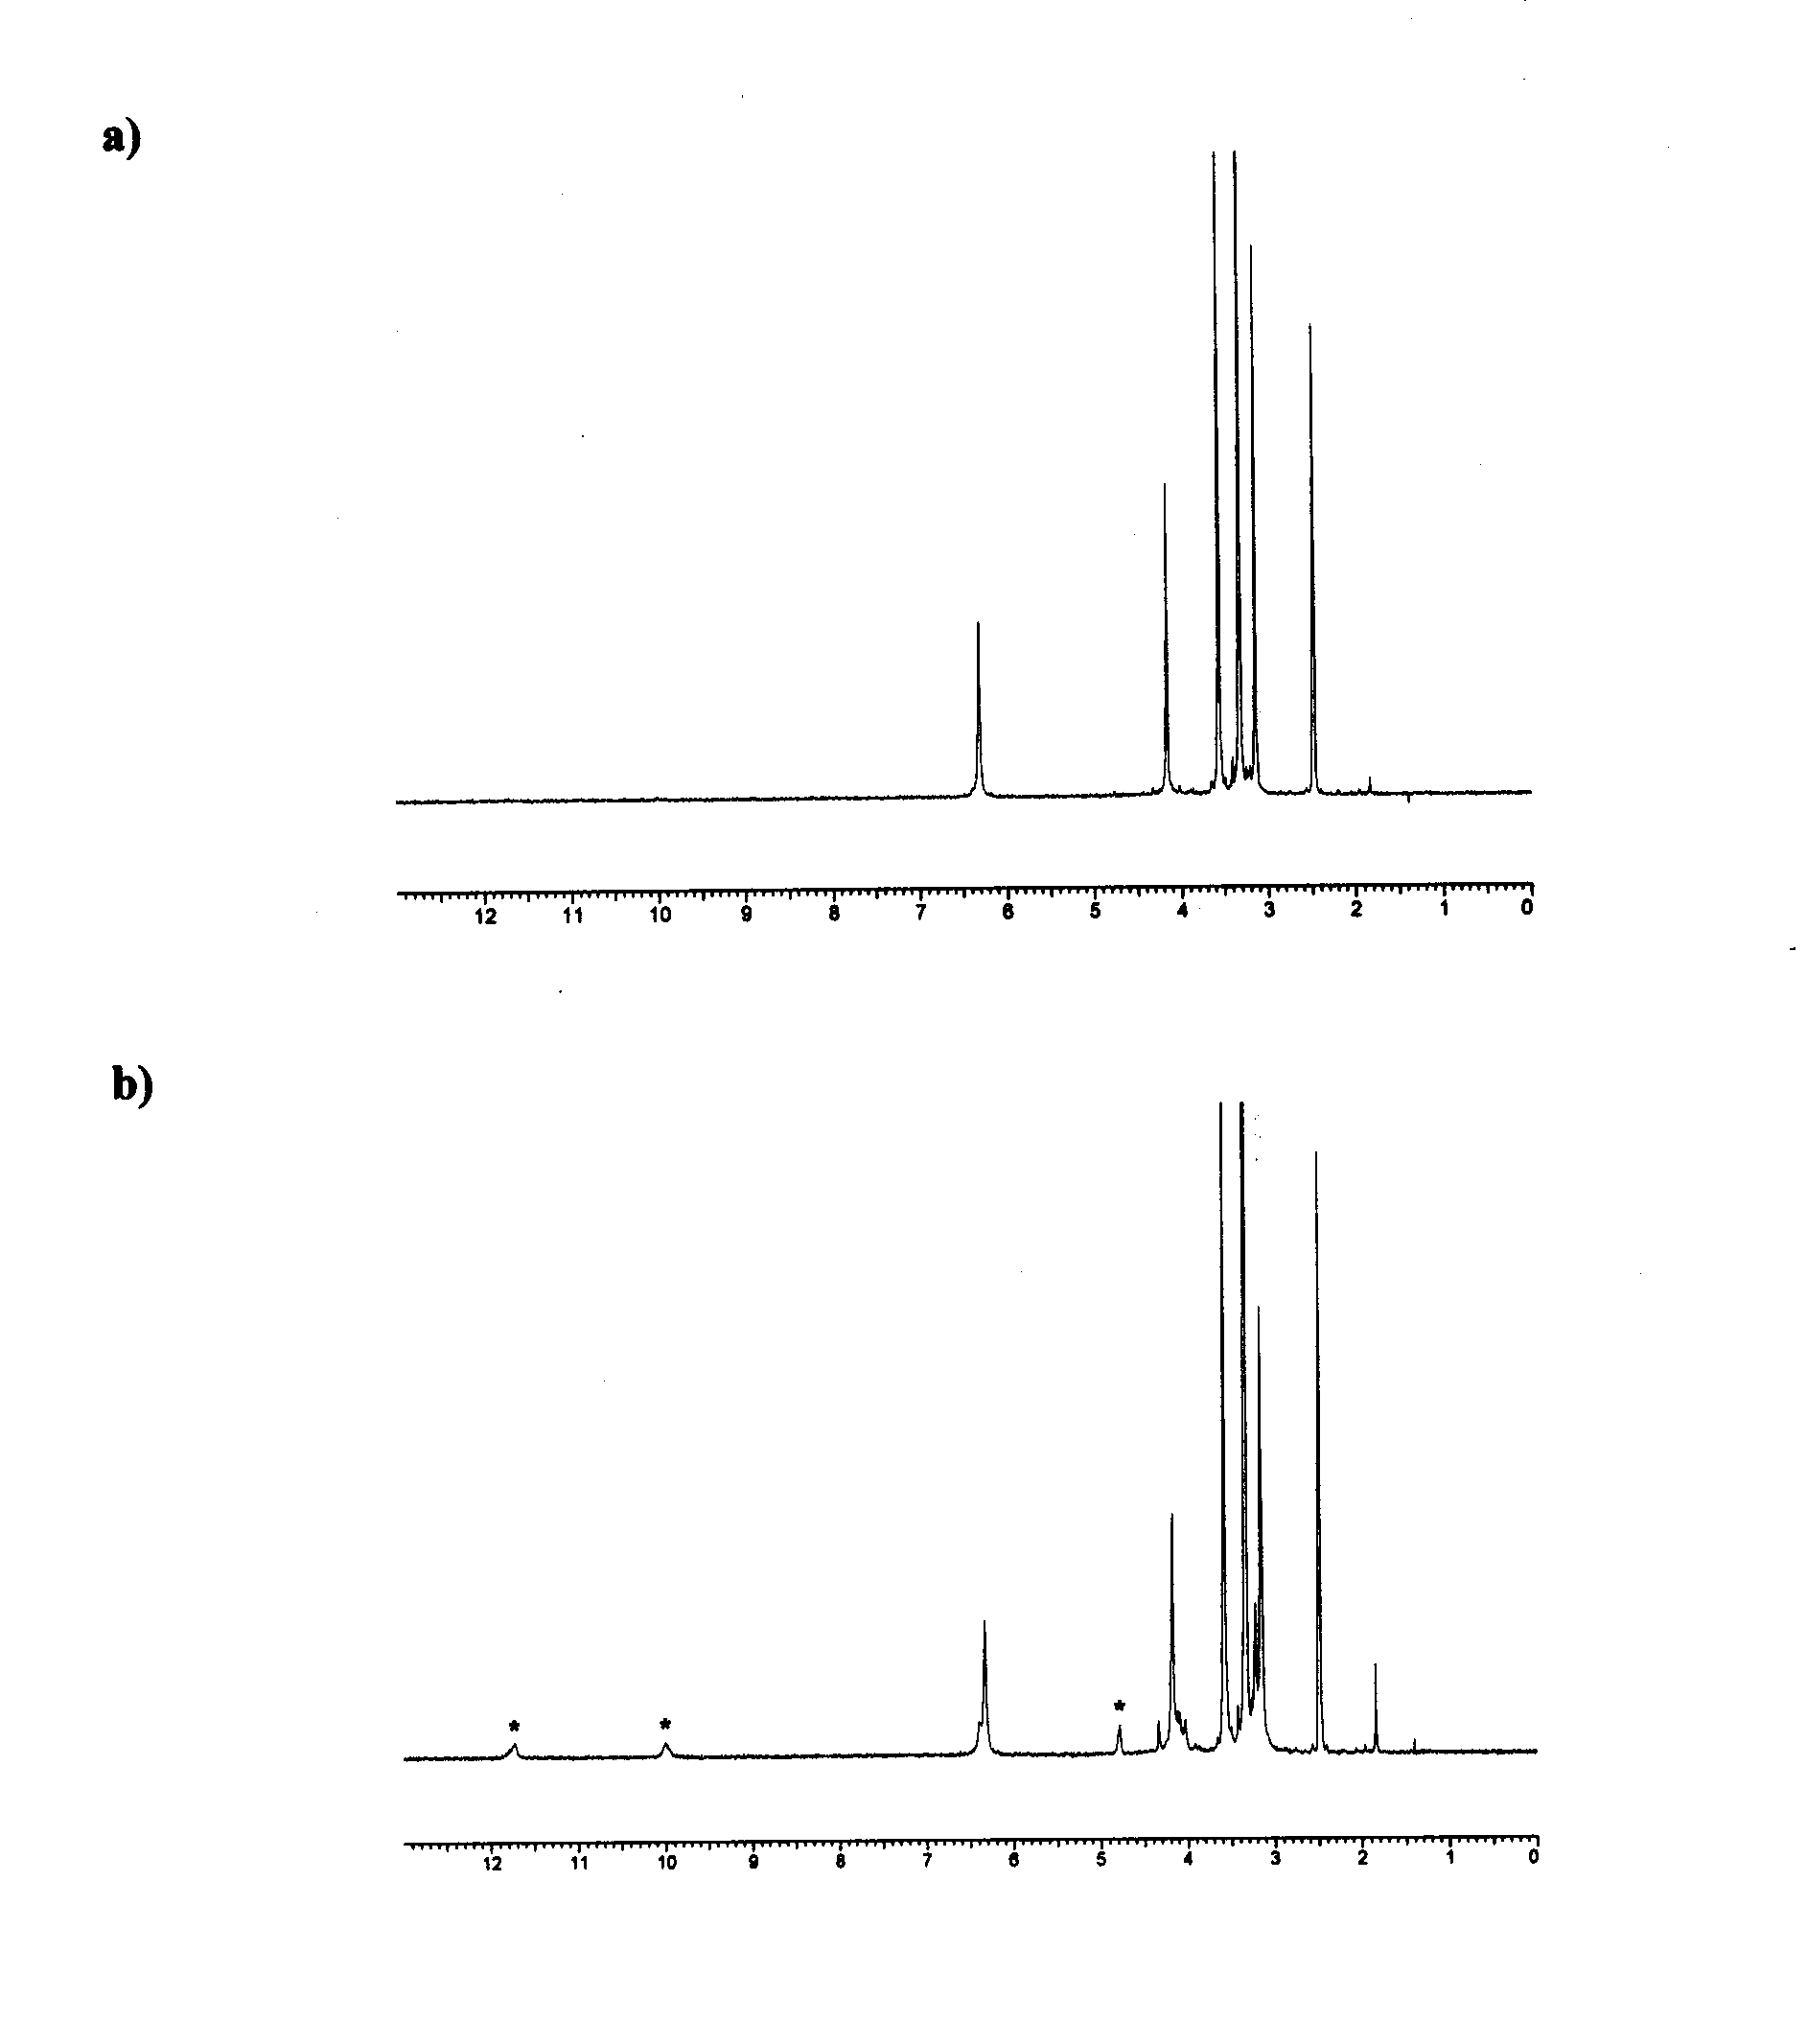


**SF2.-** a) 1H NMR spectrum of [Cd(TSC4)2] at room temperature; b) 1H NMR spectrum of the same sample after 1 hour heating at 90ºC. Signals marked with an asterisk correspond to the pyrazolonate ligand.

**SF3.** O 1*s* core level spectra for [ZnL42]·H2O and [Zn(L4-H)]
